# Supplementary material for: Long non-coding RNA lnc-CCNL1-3:1 promotes granulosa cell apoptosis and suppresses glucose uptake in women with polycystic ovary syndrome
Source: PubMed Central journal article supplement — Mol Ther Nucleic Acids. 2020 Dec 15;23:614–28. doi: 10.1016/j.omtn.2020.12.008 (PMC7819816; doi:10.1016/j.omtn.2020.12.008), 2020-12-15
Supplement: mmc1.pdf [file mmc1.pdf]

OMTN, Volume 23

## **Supplemental Information**

**Long non-coding RNA Inc-CCNL1-3:1 promotes  
granulosa cell apoptosis and suppresses glucose  
uptake in women with polycystic ovary syndrome**

**Jiayu Huang, Jun Zhao, Xueying Geng, Weiwei Chu, Shang Li, Zi-Jiang Chen, and Yanzhi Du**

**Table S1. Small interfering RNA sequences used for transfection**

| <b>Target genes</b> | <b>Sequences (5' → 3')</b>        |
|---------------------|-----------------------------------|
| FOXO1               | F:5'- GGACAACAACAGUAAAUUUdTdT -3' |

Notes: F, forward; R, reverse; FOXO1, forkhead box protein O1.

**Table S2. Primer sequences and amplification conditions used for real-time PCR**

| <b>Genes</b>    | <b>Primer sequences (5' → 3')</b>                              | <b>Amplification condition</b>                                                       |
|-----------------|----------------------------------------------------------------|--------------------------------------------------------------------------------------|
| CCNL            | F:5'-TTTGCAGCATTTCCTCCTCT-3'<br>R:5'-CTCCCAAAGTGCTGGGTTTA-3'   |                                                                                      |
| FOXO1           | F:5'-TCGTACGCCGACCTCATCA-3'<br>R:5'-TCCTTGAAGTAGGGCACGCTC-3'   |                                                                                      |
| ACTB            | F:5'-CTCCATCCTGGCCTCGCTGT-3'<br>R:5'-GCTGTCACCTTCACCGTTCC-3'   | Stage 1: 95°C, 10 sec<br>Stage 2: 95°C, 5 sec<br>60°C, 34 sec<br>Number of cycles:40 |
| U6              | F:5'-CTCGCTTCGGCAGCACA-3'<br>R:5'-AACGCTTCACGAATTTGCGT-3'      |                                                                                      |
| GADD45 $\alpha$ | F:5'-TGCTGGTGACGAATCCAC-3'<br>R:5'-TAGCGACTTTCCCGGCAA-3'       |                                                                                      |
| TRAIL           | F:5'-ACATTGTCTTCTCCAAACTCCA-3'<br>R:5'-GCTCAGGAATGAATGCCCA-3'  |                                                                                      |
| Bim             | F:5'-GCTTACTATGCAAGGAGGGTAT -3'<br>R:5'-ACAAGAGAACCGCTGGCT -3' |                                                                                      |

Notes: F, forward; R, reverse; CCNL: Lnc-CCNL1-3:1; FOXO1: forkhead box protein O1; ACTB:  $\beta$ -Actin. GADD45 $\alpha$ : Growth arrest and DNA damage inducible protein 45 $\alpha$ ; TRAIL: TNF related apoptosis inducing ligand; Bim: Bcl-2 interacting mediator of cell death.

**Table S3. Primer sequences and amplification conditions used for real-time PCR in RLM-RACE**

| <b>Fragmented primers</b> | <b>Sequences (5' → 3')</b>                  | <b>Amplification condition</b> |
|---------------------------|---------------------------------------------|--------------------------------|
|                           | Lnc-CCNL1-F GGGTCTCTAGATGTCCATGA            | Stage 1:                       |
|                           | Lnc-CCNL1-R GCTGGGTTTACAGGTGTAAG            | 94°C, 2 min                    |
|                           |                                             | Stage 2:                       |
| 5'RACE                    | rLnc-CCNL1-R1 GATAGCCTATGCCAGGTTTCTGAGGAGTT | 94°C, 30 sec                   |
|                           | rLnc-CCNL1-R2 CCTGGTGTGTAAGTGGGATGCAGTCTTG  | 62°C, 30 sec                   |
|                           |                                             | 68°C, 30 sec                   |
| 3'RACE                    | rLnc-CCNL1-F1 GGTCAAAGGCATGAGTTTCCAGGAGAT   | Number of cycles:              |
|                           | rLnc-CCNL1-F2 GACTAGAGGATGACTGTTGACTAGATT   | 38                             |

Notes: RLM-RACE, RNA ligase-mediated rapid amplification of 5' and 3' cDNA ends; F, forward; R, reverse; CCNL: Lnc-CCNL1-3:1;

**Table S4. Primary antibodies used for western blot and Immunofluorescence assay**

| <b>Protein target</b>                 | <b>Host</b>          | <b>Dilution used</b> | <b>Manufacturer</b>       |
|---------------------------------------|----------------------|----------------------|---------------------------|
| $\beta$ -Actin                        | Mouse<br>Monoclonal  | 1:3000               | Proteintech Group Inc     |
| GAPDH                                 | Mouse<br>Monoclonal  | 1:3000               | Proteintech Group Inc     |
| Lamin A/C                             | Mouse<br>Monoclonal  | 1:3000               | Cell Signaling Technology |
| Tubulin                               | Mouse<br>Monoclonal  | 1:3000               | Proteintech Group Inc     |
| FOXO1                                 | Rabbit<br>Monoclonal | 1:1000               | Cell Signaling Technology |
| Total PARP                            | Rabbit<br>Monoclonal | 1:1000               | Cell Signaling Technology |
| Cleaved PARP                          | Rabbit<br>Monoclonal | 1:500                | Invitrogen                |
| Total Caspase-3                       | Rabbit<br>Monoclonal | 1:1000               | Cell Signaling Technology |
| Cleaved Caspase-3                     | Rabbit<br>Monoclonal | 1:1000               | Cell Signaling Technology |
| Bcl-2                                 | Rabbit<br>Monoclonal | 1:1000               | Cell Signaling Technology |
| Bax                                   | Mouse<br>Monoclonal  | 1:1000               | Cell Signaling Technology |
| GLUT4                                 | Rabbit<br>Polyclonal | 1:1000               | Abcam                     |
| IRS1                                  | Rabbit<br>Polyclonal | 1:1000               | Cell Signaling Technology |
| Phospho-Rb                            | Rabbit<br>Polyclonal | 1:1000               | Cell Signaling Technology |
| Rb                                    | Mouse<br>Monoclonal  | 1:2000               | Cell Signaling Technology |
| Phospho-CDK2                          | Rabbit<br>Polyclonal | 1:1000               | Cell Signaling Technology |
| CDK2                                  | Mouse<br>Monoclonal  | 1:1000               | Cell Signaling Technology |
| P21 (CDKN1A)                          | Rabbit<br>Polyclonal | 1:1000               | Cell Signaling Technology |
| Alexa Fluor 488<br>(green)-conjugated | Goat<br>Polyclonal   | 1:100                | Invitrogen                |

goat anti-rabbit IgG

---

Notes: FOXO1: forkhead box protein O1; PARP: poly-ADP-ribose polymerase; Bcl-2: B cell lymphoma-2; Bax: BCL2-associated X; GLUT4: glucose transporter 4; IRS1: insulin receptor substrate 1; CDK2: cyclin-dependent kinase 2; P21 (CDKN1A): cyclin-dependent kinase inhibitor 1A.

**Table S5. The relative endocrine parameters in patients with PCOS**

|                          | <b>PCOS (n = 43)</b> |
|--------------------------|----------------------|
| BMI (kg/m <sup>2</sup> ) | 22.73 ± 3.34         |
| FBG (mmol/L)             | 5.46 ± 0.55          |
| 2HPG (IU/L)              | 6.97 ± 1.99          |
| Flns (mIU/L)             | 17.50 ± 16.53        |
| HOMA-IR                  | 4.46 ± 0.73          |

Notes: All data are mean ± SD value. FPG: Fasting blood glucose; 2HPG: 2 hour postprandial blood glucose; Flns: fasting insulin; HOMA-IR: Homeostasis model assessment of insulin resistance.

**Table S6. Range of HOMA-IR in women with PCOS**

| <b>HOMA-IR</b> |       |       |
|----------------|-------|-------|
| Minimum        |       | 0.71  |
| Maximum        |       | 20.73 |
| Tertile        | 33.33 | 2.04  |
|                | 66.66 | 3.89  |

Notes: HOMA-IR: Homeostasis model assessment of insulin resistance



**Table S7. Prediction of Lnc-CCNL1-3:1 and FOXO1 affinity using the RPISeq RNA-Protein Interaction Prediction (RPISeq)**

**Protein Sequence (FOXO1)**

MRSKHTANCLAFRCILAWPGGLAQNCWCQNSIRHNLSLHSKFIRVQNEG TG  
 KSSWWMLNPEGGKSGKSPRRRAASMDNNSKFAKRSRAAKKKASLQSGQ  
 EGAGDSPGSQFQSKWPASPGSHSNDDFDNWSTFRPRTSSNASTISGR LSPIMT  
 EQDDLGEQDVHSMVYPPSAAKMASTLPSLSEISNPENMENLLDNLNLLSSP  
 TSLTVSTQSSPGTMMQQTPCYSFAPPNTSLNSPSPNYQKYTYGQSSMSPLPQ  
 MPIQTLQDNKSSYGGMSQYNCAPGLLKELLTSDSPPHNDIMTPVDPGVAQP  
 NSRVLGQNVMMGPNSVMSTYGSQASHNKMMNPSSHTHPGHAQQTSAVN  
 GRPLPHTVSTMPHTSGMNRLTQVKTPVQVPLPHPMQMSALGGYSSVSSCN  
 GYGRMGLLHQEKLPDLDGMFIERLDCDMESIIRNDLMDGDTLDFNFDNV  
 LPNQSFPHSVKTTTHSWVSG

**RNA Sequence (lnc-CCNL1-3:1)**

AGCTCTCAGTGTGTGCTCATTGGTTTCATCAAAGCAGGACAATACTTG  
 GACTAAGTCGACAAAATTCTCACTTCTGCAGTGGGTCTCTAGATGTCCA  
 TGACCCTGCCTTCTCAGGAAAAGAGGGAGGACATGCGGCTGGAGGGAC  
 ACAGAGGGCAAGACTGCATCCCAGTTACAACACCAGGAAGCCACGTCT  
 GAAAGGAAACTCCTCAGAAACCTGGGCATAGGCTATCGGGAAAGTAAA  
 GAAGACATCTGGAGAGGCGAATATTCTGAAGGAATCTCTGCCAGAGGAG  
 AAGGGAAAAGGAAAGCACTTATCCAGGTCAAAGGCATGAGTTTCCAGG  
 AGATTATTCATCGTGACTAGAGGATGACTGTTGACTAGATTTATTCCACAG  
 GTATGGAAGGAAAAGTCTTGGTACATTTTTTGCAGCATTTCCTCCTCTCC  
 ATATAGACTGTTCTCATTCTGCAGGGCTGGGGTTCACCCAGTATTCAACT  
 CCAAGCCCTTCACATAGTAAAAGAAGTAAGGGGAGCCAGGCATGGTGGC  
 TTACACCTGTAAACCCAGCACTTTGGGAGGGCAAAGCAGGCAGATTCAT  
 TGAGCTCAGGAGTTCGACCCCAACCTGGGCAACATGGTGAAACCCTGTC  
 TCTACTAAAATACAAAAATTAGCTGGGTGTGGTGGTGCATGCCTGTGGT  
 CCCAGCTACTCTGGAGGCTGAGGTGGTAGGATTGCTTGAGCCCACATGT  
 GTGAGGCTGCAGTGAGCTGTGATCACACCACTGCTCTCCAGCCTGGGTG  
 ACAGAGTGAGAGACCCTGTCCCCCAACCACCCCCCAACAAAAAAA  
 AAAAAAA

**Interaction probabilities**

|                                 |      |
|---------------------------------|------|
| Prediction using RF classifier  | 0.75 |
| Prediction using SVM classifier | 0.65 |

Notes: The sequence of lnc-CCNL1-3:1 (CCNL) was obtained from the RACE assay. Interaction probabilities generated by RPISeq range from 0 to 1. In performance evaluation experiments, predictions with probabilities > 0.5 were considered “positive,” indicating that the corresponding RNA and protein are likely to interact.

**Table S8. Prediction of Lnc-CCNL1-3:1 and EZH2 affinity using the RPISeq RNA-Protein Interaction Prediction (RPISeq)**

**Protein Sequence (EZH2)**

MGQTGKKSEKGPVCWRKRVKSEYMRLRQLKRFRADEVKSMFSSNRQKI  
 LERTEILNQEWKQRRIQPVHILTSCSVTSDLDFPTQVIPLKTLNAVASVPIMYS  
 WSPLQQNFMVEDETVLHNPYMGDEVLDQDGTFFIEELIKNYDGKVHGDRE  
 CGFINDEIFVELVNALGQYNDDDDDDGDDPEEREKQKDLEDHRDDKES  
 RPPRKFPSPKIFEAISSMFPDKGTAEELKEYKELTEQQLPGALPPECTPNID  
 GPNAKSVQREQSLHSFHTLFCRRCFKYDCFLHPFHATPNTYKRKNTETALD  
 NKPCGPQCYQHLEGAKEFAAALTAERIKTPPKRPGGRRRGRLPNNSRPSTP  
 TINVLESKDTSDREAGTETGGENNDKEEEEKDETSSESSEANSRCQTPIKM  
 KPNIIPPENVEWSGAEASMFVRLIGTYNDNFCAIARLIGTKTCRQVYEFVRK  
 ESSIIAPAPAEDVDTPPRKKKRKHLWAHCRKIQLKKGQNRFPGCRCKAQ  
 CNTKQCPCYLAVRECDPDLCLTCGAADHWDSKNVSKNCSIQRGSKKHL  
 LAPSDVAGWGIFIKDPVQKNEFISEYCGEISQDEADRRGKVYDKYMCSFLF  
 NLNDFVVDATRKGNKIRFANHSVNPNCYAKVMMVNGDHRIGIFAKRAIQ  
 TGEELFFDYRYSQADALKYVGIEREMEIP

**RNA Sequence (lnc-CCNL1-3:1)**

AGCTCTTCAGTGTTGTGCTCATTGGTTTCATCAAAGCAGGACAATACTTG  
 GCACTAAGTCGACAAAATTCTCACTTCTGCAGTGGGTCTCTAGATGTCCA  
 TGACCCTGCCTTCTCAGGAAAAGAGGGAGGACATGCGGCTGGAGGGAC  
 ACAGAGGGCAAGACTGCATCCAGTTACAACACCAGGAAGCCACGTCT  
 GAAAGGAAACTCCTCAGAAACCTGGGCATAGGCTATCGGGAAAGTAAA  
 GAAGACATCTGGAGAGGCGAATATTCTGAAGGAATCTCTGCCAGAGGAG  
 AAGGGAAAAGGAAAGCACTTATCCAGGTCAAAGGCATGAGTTTCCAGG  
 AGATTATTCATCGTGACTAGAGGATGACTGTTGACTAGATTTATTCCACAG  
 GTATGGAAGGAAAAGTCTTGGTACATTTTTTGCAGCATTTCCTCCTCTCC  
 ATATAGACTGTTCTCATTCTGCAGGGCTGGGGTTCACCCAGTATTCAACT  
 CCAAGCCCTTACATAGTAAAAGAAGTAAGGGGAGCCAGGCATGGTGGC  
 TTACACCTGTAAACCCAGCACTTTGGGAGGGCAAAGCAGGCAGATTCAT  
 TGAGCTCAGGAGTTCGACCCCAACCTGGGCAACATGGTGAAACCCTGTC  
 TCTACTAAAAATACAAAATTAGCTGGGTGTGGTGGTGCATGCCTGTGGT  
 CCCAGCTACTCTGGAGGCTGAGGTGGTAGGATTGCTTGAGCCCACATGT  
 GTGAGGCTGCAGTGAGCTGTGATCACCACTGCTCTCCAGCCTGGGTG  
 ACAGAGTGAGAGACCCTGTCCCCCAACCACCCCCCAACAAAAAAA  
 AAAAAA

**Interaction probabilities**

|                                 |      |
|---------------------------------|------|
| Prediction using RF classifier  | 0.65 |
| Prediction using SVM classifier | 0.89 |

Notes: The sequence of lnc-CCNL1-3:1 (CCNL) was obtained from the RACE assay. Interaction

probabilities generated by RPISeq range from 0 to 1. In performance evaluation experiments, predictions with probabilities  $> 0.5$  were considered “positive,” indicating that the corresponding RNA and protein are likely to interact.

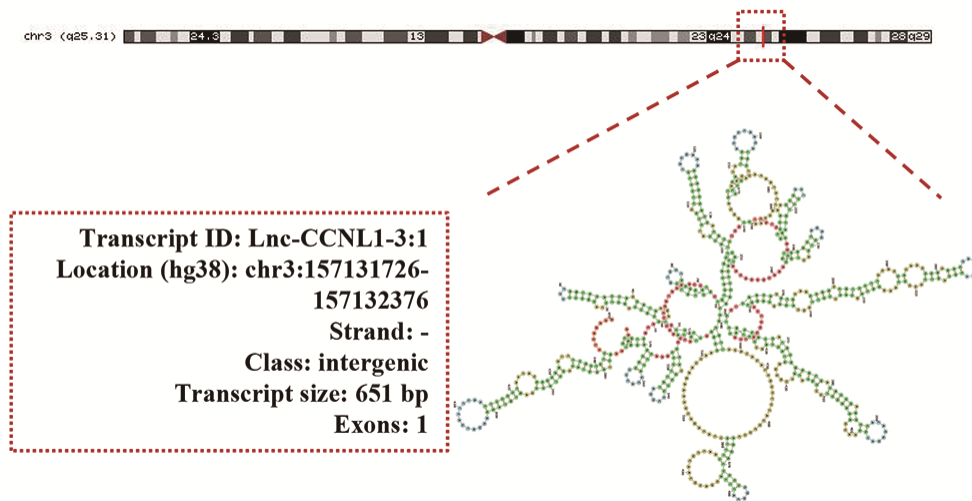

**Figure S1.** Basic information for lnc-CCNL1-3:1 from the NONCODE database (Transcript ID: NONHSAT092887.2).



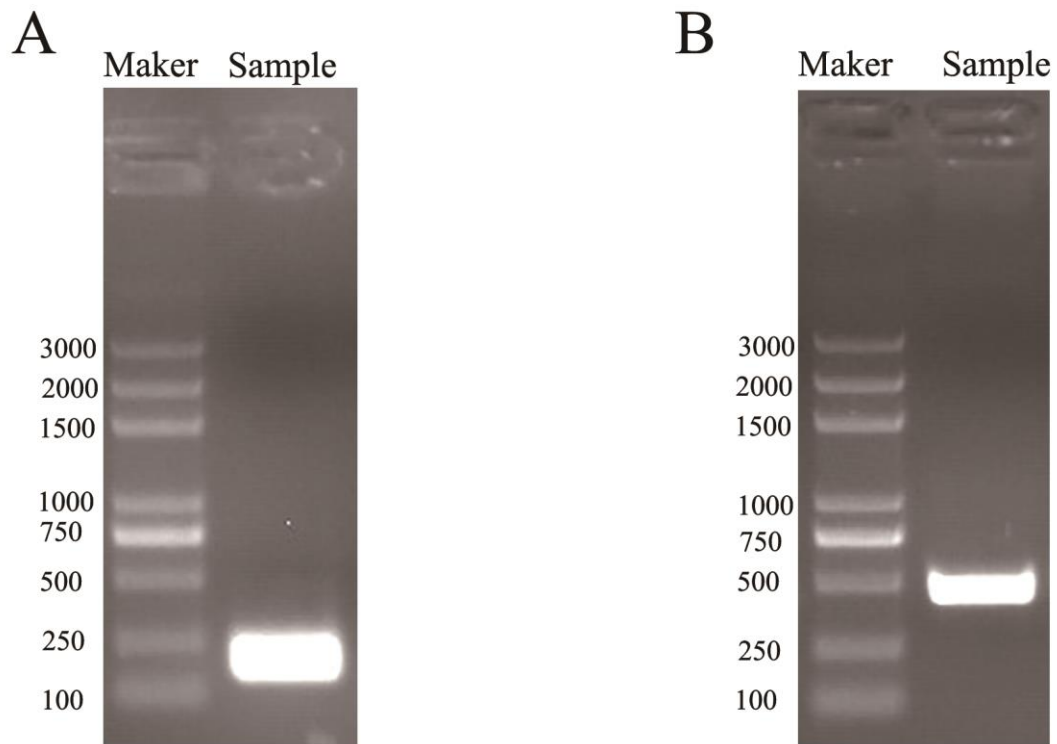

**Figure S3.** 5' and 3' rapid amplification of cDNA ends (RACE) assays in KGN cells to detect the whole sequence of CCNL. A: a gelelectrophoresis image of PCR products from the 5'RACE assays. B: a gelelectrophoresis image of PCR products from the 3'RACE assays.

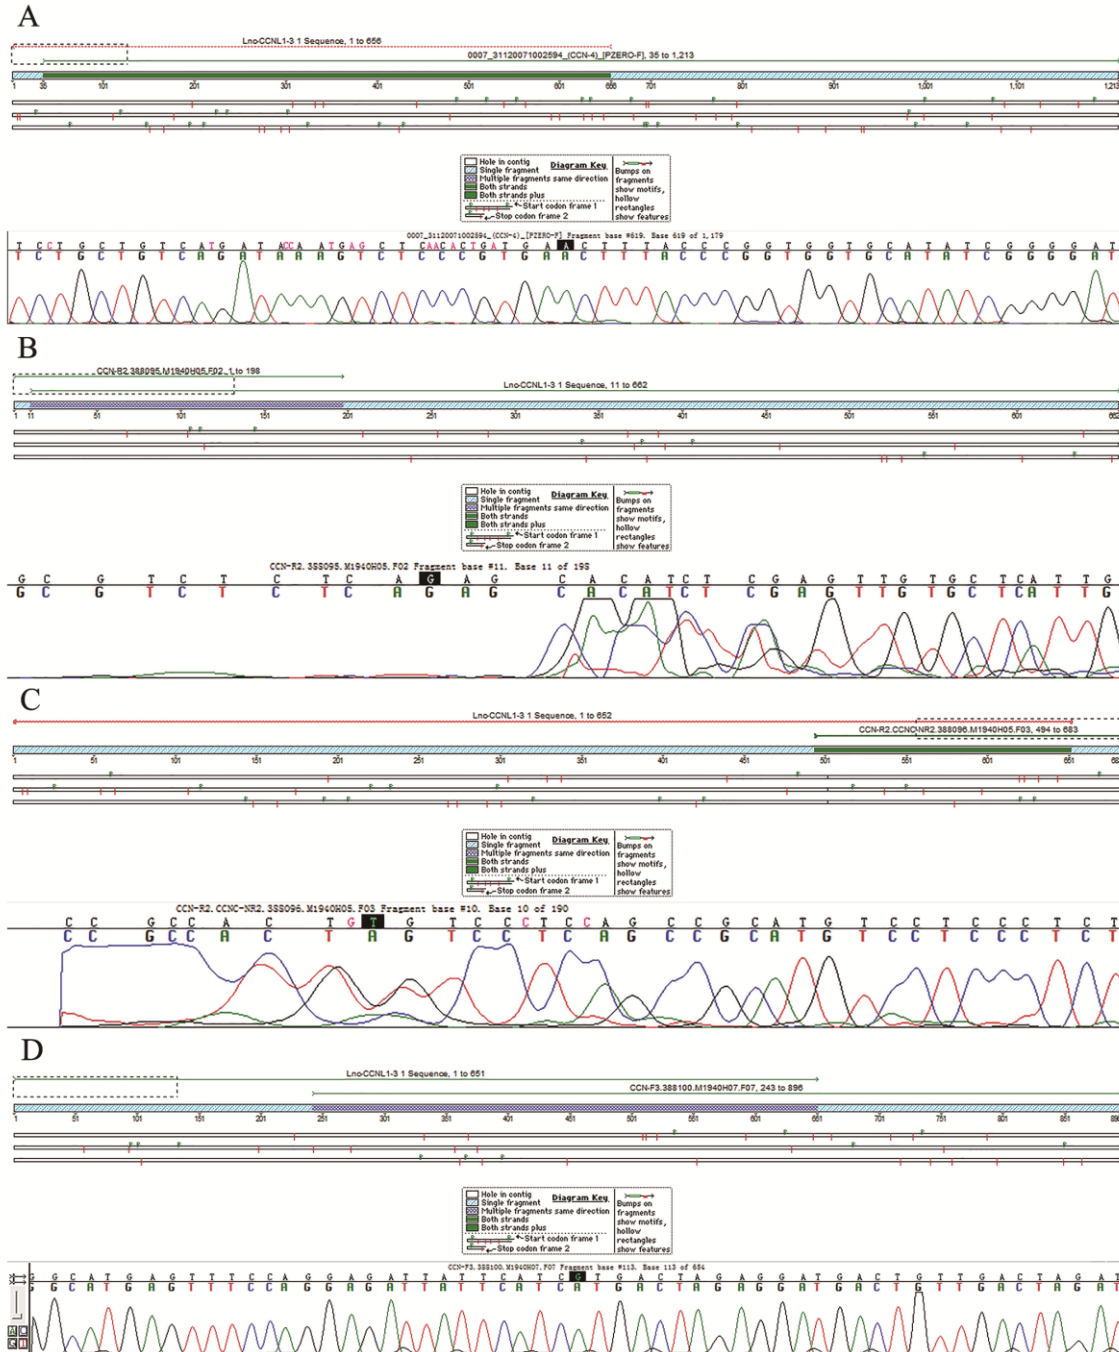

**Figure S4.** The validation of CCNL fragment sequence using Sequencher (Gene Codes Corporation, Michigan, USA). Lnc-CCNL 1-3:1 sequence was obtained from the NONCODE database (Transcript ID: NONHSAT092887.2) and consistent with our results from RACE experiment. A: The part of CCNL sequence from PCR products compared with Lnc-CCNL 1-3:1 sequence. B, C: The CCNL sequence from 5' RACE PCR products compared with Lnc-CCNL 1-3:1 sequence. D: The CCNL sequence from 3' RACE PCR products compared with Lnc-CCNL 1-3:1 sequence.

A

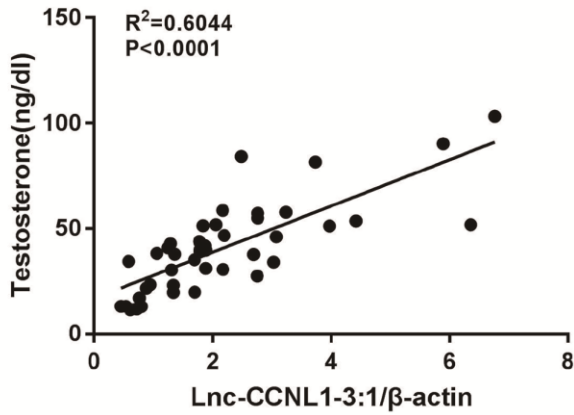

B

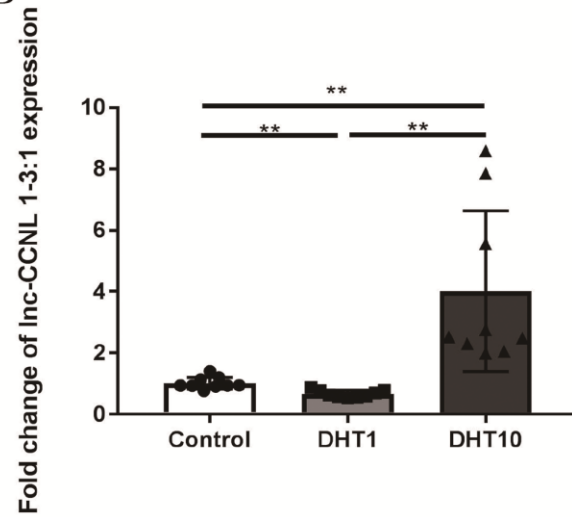

**Figure S5.** Androgen excess induces Lnc-CCNL1-3:1 expression. A: The correlation between the expression level of *CCNL* in the serum concentration of testosterone in patients with PCOS (n = 43). The expression level was detected via qRT-PCR and normalized against  $\beta$ -actin. B: Androgen excess induces *CCNL* expression in KGN cells. KGN cell lines were preincubated with 1 or 10mM double hydrogen testosterone (DHT) medium for 24 hours then subjected to qRT-PCR analysis and normalized against  $\beta$ -actin to measure *CCNL* expression. Error bars represent SDs of at least 3 independent experiments. \*\*\*:  $p < 0.001$ , \*\*:  $p < 0.01$ , \*:  $p < 0.05$  correspond to two-tailed Student's tests.



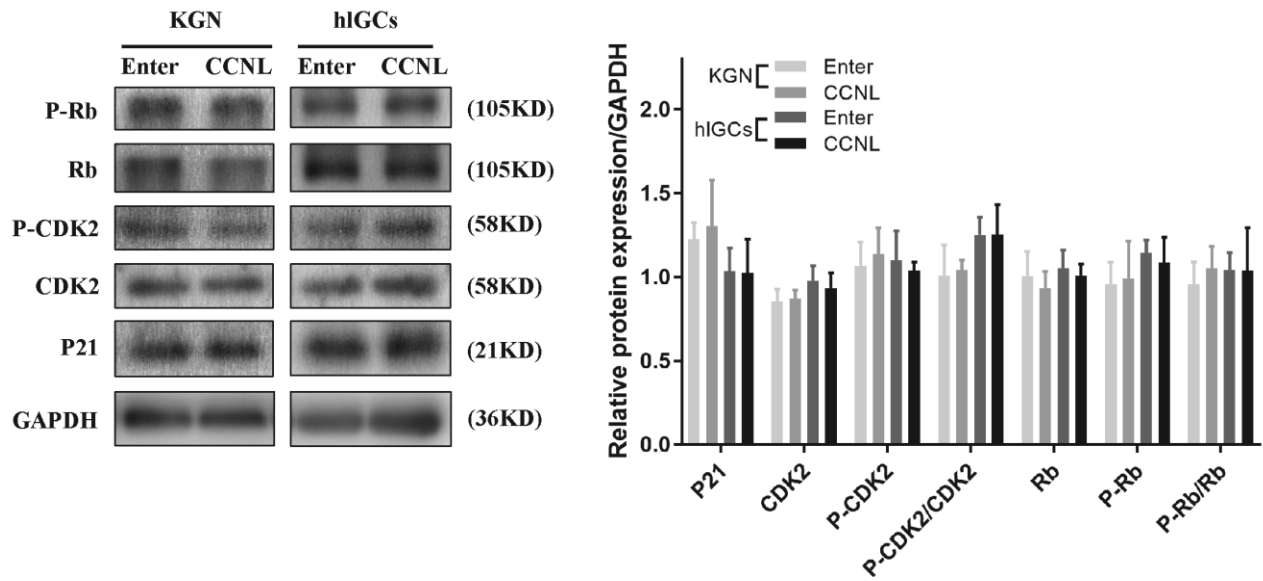

**Figure S6.** Western blotting analysis to measure relative protein expression (P-Rb: Phospho-Rb, Rb, P-CDK2: Phospho-CDK2, CDK2, P21: CDKN1A) from KGN and hIGCs cells (n=3) after transfected with vectors for 72 h.\*\*\*: Error bars represent SDs of at least 3 independent experiments.  $p < 0.001$ , \*\*:  $p < 0.01$ , \*:  $p < 0.05$  correspond to two-tailed Student's tests.

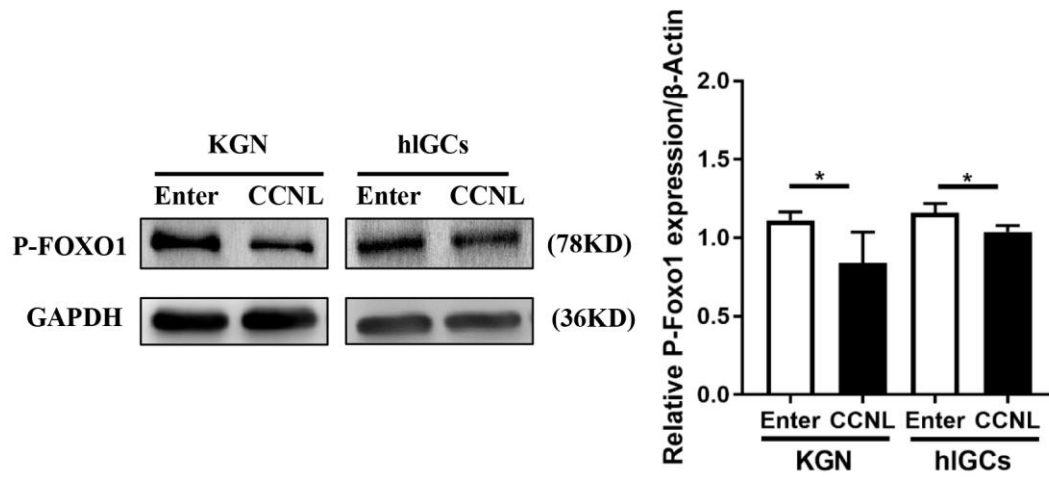

**Figure S7.** Western blotting analysis to measure relative p-FOXO1 expression (p-FOXO1: Phospho- FOXO1) from KGN and hIGCs cells after transfected with vectors for 72 h.\*\*\*: Error bars represent SDs of at least 3 independent experiments.  $p < 0.001$ , \*\*:  $p < 0.01$ , \*:  $p < 0.05$  correspond to two-tailed Student's tests. FOXO1: forkhead box protein O1.

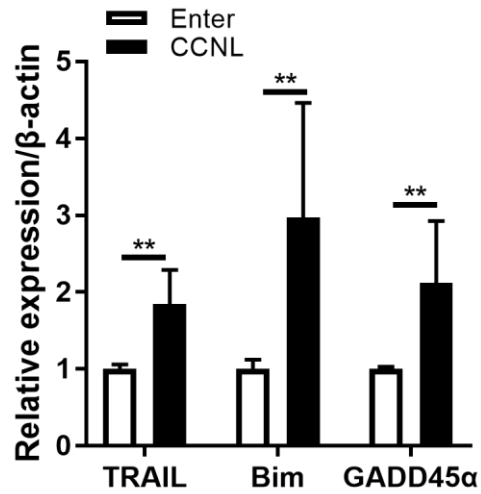

**Figure S8.** QPCR analysis to measure relative expression (TRAIL, Bim and GADD45 $\alpha$ ) from KGN cells after transfected with vectors for 72 h.\*\*\*: Error bars represent SDs of at least 3 independent experiments.  $p < 0.001$ , \*\*:  $p < 0.01$ , \*:  $p < 0.05$  correspond to two-tailed Student's tests. GADD45 $\alpha$ : Growth arrest and DNA damage inducible protein 45 $\alpha$ ; TRAIL: TNF related apoptosis inducing ligand; Bim: Bcl-2 interacting mediator of cell death.

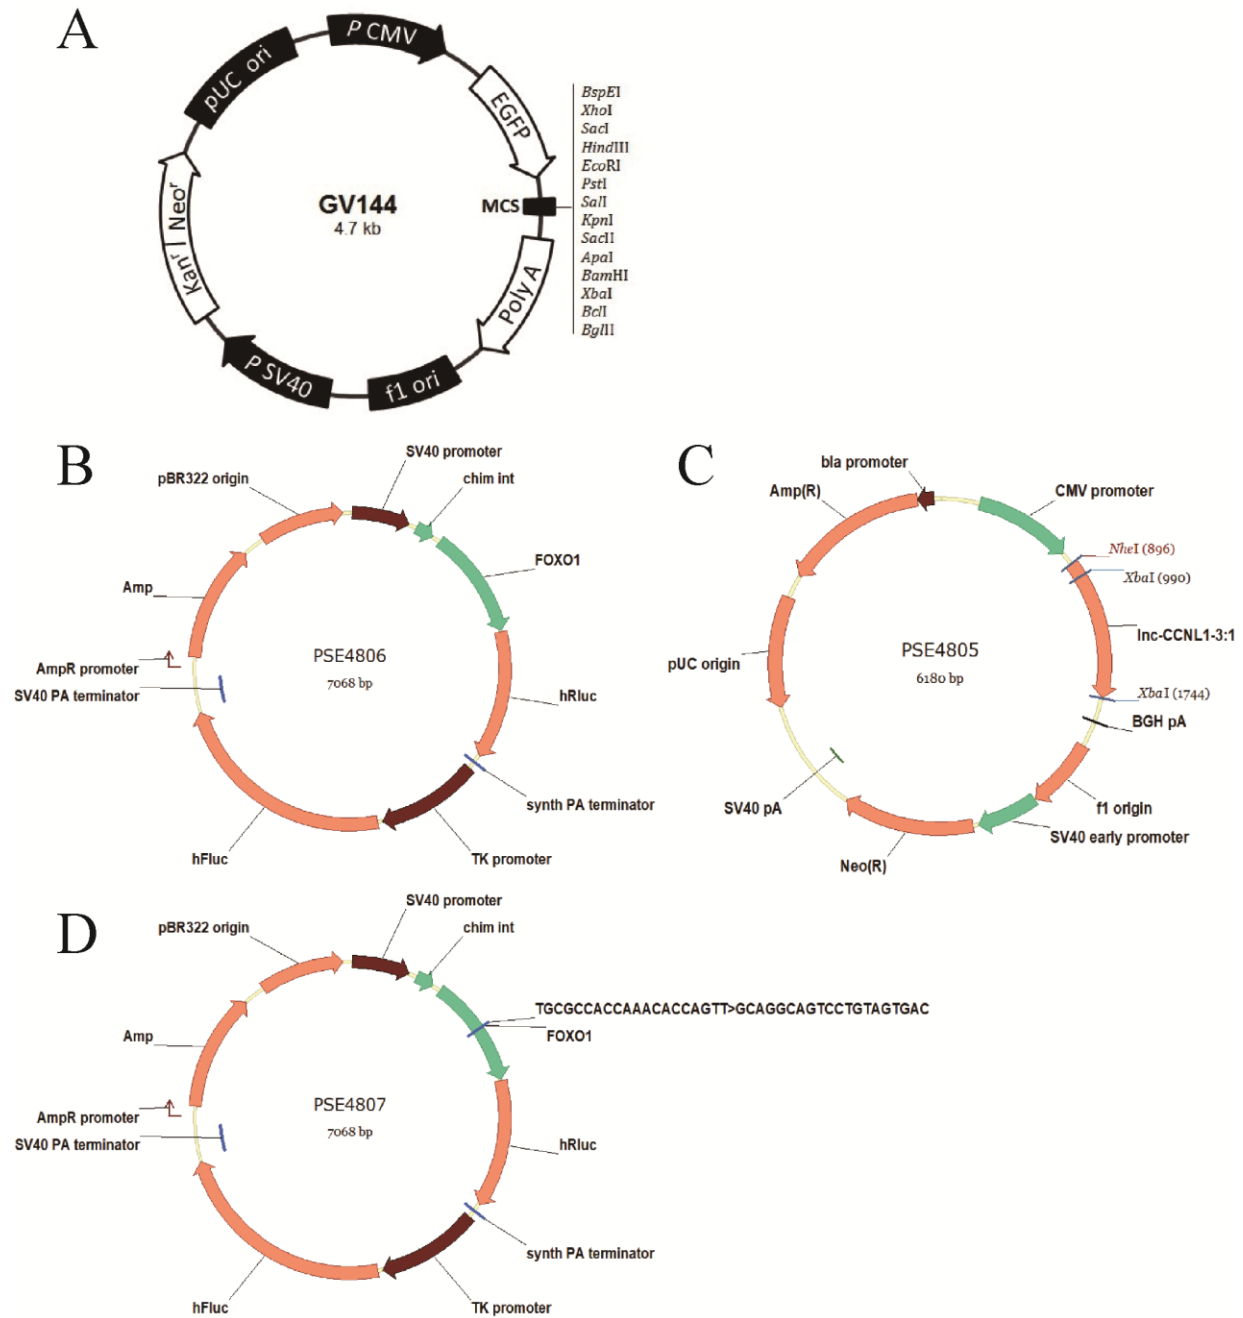

**Figure S9.** Vector backbone for transfection and luciferase reporter assays. A: Vector backbone for CCNL transfection. B-D: Vector backbone for luciferase reporter assays. B: pcDNA3.1-CCNL. C: pcDNA3.1-FOXO1. D: pcDNA3.1-FOXO1-mut. FOXO1: forkhead box protein O1.

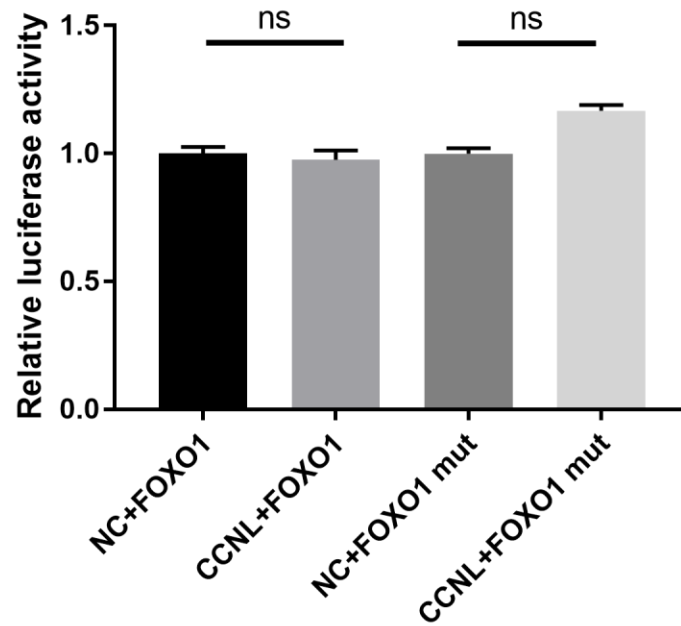

**Figure S10.** After co-transfection of pcDNA3.1-FOXO1, or pcDNA3.1-FOXO1-mut with pcDNA3.1, pcDNA3.1-CCNL into 293T cells. Results are shown as the relative ratio of firefly luciferase activity to Renilla luciferase activity. FOXO1: forkhead box protein O1.
